## GULP1/CED-6 ameliorates amyloid- $\beta$ toxicity in a *Drosophila* model of Alzheimer's disease

Wai Yin Vivien Chiu<sup>1,\*</sup>, Alex Chun Koon<sup>1,\*</sup>, Jacky Chi Ki Ngo<sup>1</sup>, Ho Yin Edwin Chan<sup>1</sup> and Kwok-Fai Lau<sup>1</sup>

<sup>1</sup> School of Life Sciences, The Chinese University of Hong Kong, Shatin, NT, Hong Kong SAR

\* These authors have contributed equally to this work

Correspondence to: Kwok-Fai Lau, email: kflau@cuhk.edu.hk

Keywords: CED-6, APP, A $\beta$ , neurodegeneration, neurotoxicity, Gerotarget

Received: June 13, 2017

Accepted: July 30, 2017

Published: August 08, 2017

Copyright: Chiu et al. This is an open-access article distributed under the terms of the Creative Commons Attribution License 3.0 (CC BY 3.0), which permits unrestricted use, distribution, and reproduction in any medium, provided the original author and source are credited.

### ABSTRACT

**Amyloidogenic processing of APP by  $\beta$ - and  $\gamma$ -secretases leads to the generation of amyloid- $\beta$  peptide (A $\beta$ ), and the accumulation of A $\beta$  in senile plaques is a hallmark of Alzheimer's disease (AD). Understanding the mechanisms of APP processing is therefore paramount. Increasing evidence suggests that APP intracellular domain (AICD) interacting proteins influence APP processing. In this study, we characterized the overexpression of AICD interactor GULP1 in a *Drosophila* AD model expressing human BACE and APP695. Transgenic GULP1 significantly lowered the levels of both A $\beta$ 1-40 and A $\beta$ 1-42 without decreasing the BACE and APP695 levels. Overexpression of GULP1 also reduced APP/BACE-mediated retinal degeneration, rescued motor dysfunction and extended longevity of the flies. Our results indicate that GULP1 regulate APP processing and reduce neurotoxicity in a *Drosophila* AD model.**

### INTRODUCTION

Human GULP1 (engulfment adaptor PTB-domain-containing 1), the homologue of *Caenorhabditis elegans* CED-6, is an adaptor protein with multiple protein interaction domains/regions including an N-terminal phosphotyrosine-binding (PTB) domain, a centrally located leucine zipper and a carboxyl terminal proline/serine rich region [1-3]. GULP1/CED-6 has been implicated in phagocytosis as it interacts with several engulfment receptors including CED-1, stabilin-1 and stabilin-2 [3-6]. Recently, we and others have shown that GULP1 PTB domain binds to Alzheimer's disease amyloid precursor protein (APP) [7, 8].

APP is a large type I transmembrane protein contains a large ectodomain and a small intracellular domain, namely AICD. Amyloidogenic processing of APP by  $\beta$ - and  $\gamma$ -secretases leads to the generation of amyloid- $\beta$  peptide (A $\beta$ ), and accumulation of A $\beta$  to form senile plaques is a hallmark of Alzheimer's disease (AD). Although the mechanisms by which APP processing is regulated are still not fully understood, increasing evidence suggests that AICD interacting proteins can

influence APP metabolism and A $\beta$  generation (see reviews [9, 10]). In fact, GULP1 is found to alter APP processing and A $\beta$  generation in transfected cells [7, 8]. However, the effect of GULP1 on A $\beta$  production *in vivo* remains to be determined.

To understand the effect of GULP1 *in vivo*, we utilized the fruit fly, *Drosophila melanogaster*. *Drosophila* is a popular model for studying neurodegenerative diseases, as approximately 75% of all known human disease-associated genes are conserved in flies, including those implicated in AD [11]. In addition, AD phenotypes such as learning disabilities and plaque deposition can also be observed in *Drosophila* [12, 13]. In this study, we established transgenic flies to overexpress GULP1 in an existing *Drosophila* AD model which expresses human APP695 wildtype and BACE genes. This *Drosophila* model is a powerful tool for AD research as the flies exhibit a number of clinical AD neuropathology and symptomology for both familial/sporadic AD including A $\beta$  aggregation and memory defects [14]. In this study, we observed that GULP1 reduces A $\beta$  production, reduces retinal degeneration, rescues motor dysfunction and improves the life expectancy of the flies. Our data suggest

that GULP1 is a potential modifier of neurotoxicity in AD by lowering A $\beta$  levels.

## RESULTS

### Characterization of GULP1 transgene expression in *Drosophila*

To determine the effect of GULP1 *in vivo*, we created *UAS-GULP1* transgenic flies, and crossed them to *gmr-GAL4* to overexpress GULP1 in the fly eyes. Expression of GULP1 in *gmr-GAL4/+; UAS-GULP1/+* animals (*gmr > GULP1*) was confirmed by Western blot analysis (data not shown), and there was no significant change in the number

of rhabdomeres per ommatidium between *gmr > GULP1* heterozygous and control *gmr* driver flies (Figure 1A). To investigate the effect of GULP1 on AD-like symptoms in flies, we utilized an existing *Drosophila* AD model which expresses human APP695 and BACE transgenes using *gmr-GAL4* (*gmr > APP, BACE*) [14]. We crossed the *UAS-GULP1* flies to the *gmr > APP, BACE* flies to produce *gmr-GAL4/+; UAS-APP695, UAS-BACE/UAS-GULP1* heterozygous flies (*gmr > GULP1, APP, BACE*). Western blot analysis revealed the expression of GULP1, APP and BACE transgenes in several independent lines (Figure 1B). There was no noticeable difference in GULP1 expression in different lines. The expression of a third transgene (GULP1) in the AD model did not result in a lower expression of APP or BACE due to the dilution of available GAL4. In contrary, the expression level of APP

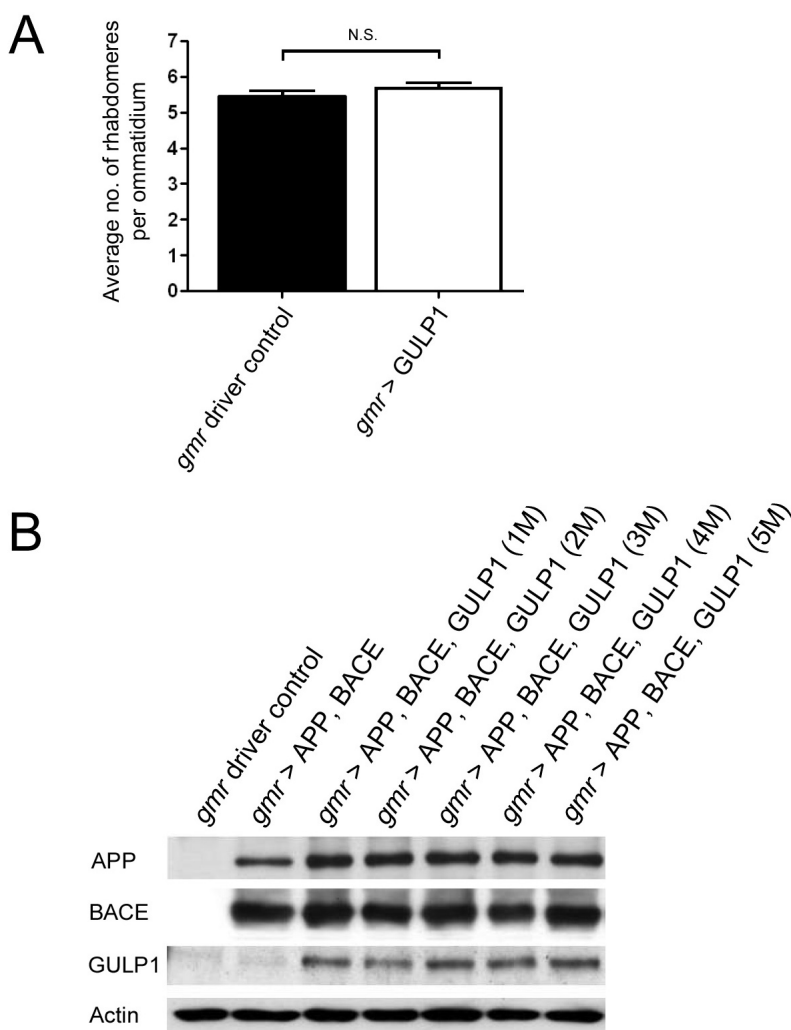

**Figure 1: Characterization of GULP1 transgene in *Drosophila*.** **A.** Overexpression of GULP1 using *gmr-GAL4* does not change the overall retinal structure. Flies were from three independent experiments. The flies were raised at 19 °C and assayed at 5 dpe. **B.** Overexpression of human APP695, BACE and GULP1 proteins in *Drosophila*. Immunoblot analysis of fly head homogenates for APP, BACE, GULP1. 1M - 5M were independent transgenic flies of GULP1 under the UAS promoter, which were crossed into the fly disease model of APP and BACE expression driven by *gmr-GAL4*. Actin was used as loading control. Flies were raised at 28 °C and assayed at 6 dpe.

holoprotein was surprisingly increased by approximately 58% in *gmr > GULP1, APP, BACE* flies as compared to *gmr > APP; BACE* flies (Figure 1B).

### Overexpression of GULP1 rescues motor dysfunction and extends life span in a *Drosophila* AD model

Progressive decline in locomotor ability is one of the surrogate markers of neurotoxicity in a number of AD models [14-16]. To investigate if GULP1 can ameliorate APP/BACE-induced motor dysfunction, pan-neuronal *elav-GAL4* driver was used to overexpress two independent *UAS-GULP1* fly lines (3M and 5M) together with *UAS-APP695* and *UAS-BACE*. Similar to the previous report, we observed that *elav > APP, BACE* heterozygous flies have reduced climbing activities, indicating that APP and BACE compromised CNS functions [14] (Figure 2A). Remarkably, overexpression of GULP1 significantly improved the APP/BACE-induced motor impairment (Figure 2B).

In addition, consistent with the previous report, the median survival time of *elav > APP, BACE* flies was markedly shorter than the heterozygous *elav-GAL4* control flies (30 days vs 80 days) (Figure 3A and 3D). On

the other hand, overexpression of GULP1 increased the lifespan of the AD model to a median survival time to 54 days (Figure 3B-3D).

### GULP1 protects against APP/BACE-induced neurodegeneration in a *Drosophila* AD model

The *Drosophila* compound eye has been widely used for monitoring neurotoxicity and neurodegeneration [17, 18]. To investigate the hypothesis that GULP1 reduces degeneration in the *Drosophila* AD model, we examined the ommatidial organization of *gmr > GULP1, APP, BACE* fly by pseudopupil assay. As shown in Figure 1B, overexpression of GULP1 did not show noticeable effect on the overall *Drosophila* retinal structure. Yet, GULP1 overexpression reduced the effect of APP/BACE-mediated degeneration as *gmr > GULP1, APP, BACE* flies showed significant higher average number of rhabdomeres per ommatidium than *gmr > APP, BACE* flies (Figure 4A-4C).

### Overexpression of GULP1 reduces A $\beta$ generation in a *Drosophila* AD model

It is known that the overexpression of human APP and BACE increases amyloidogenic processing of APP

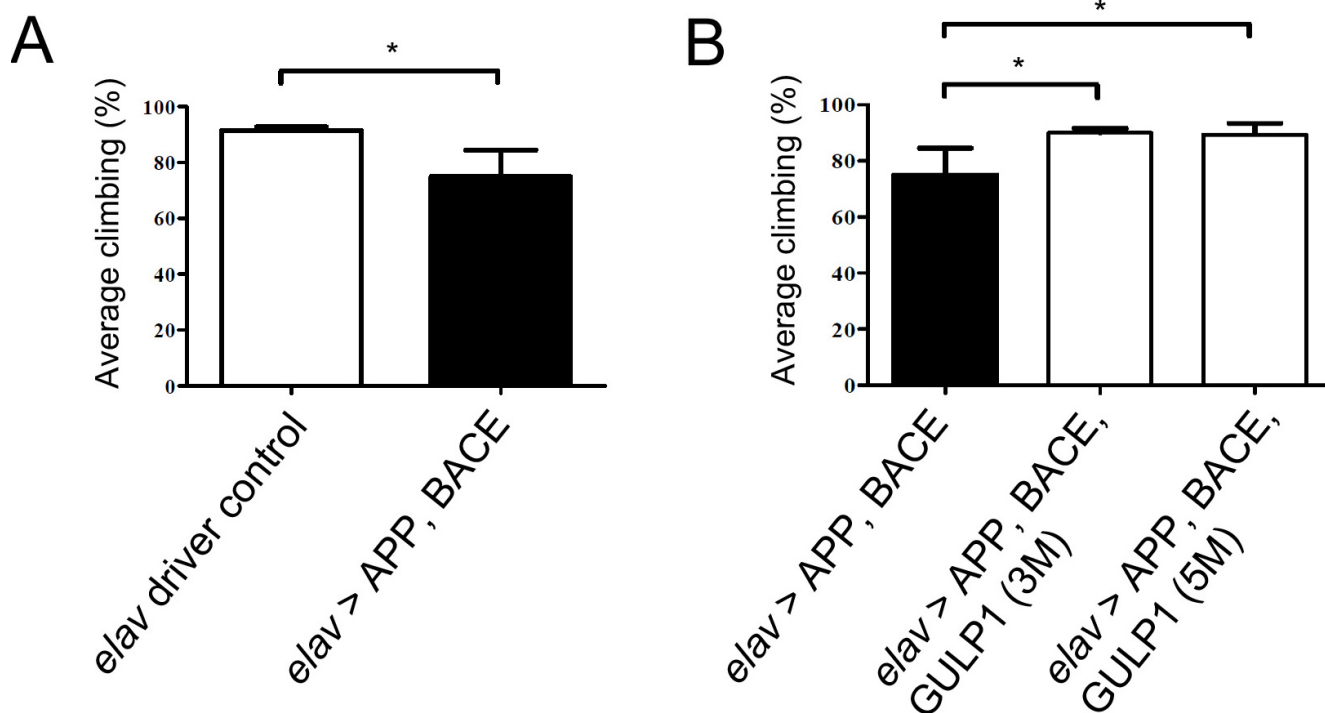

**Figure 2: GULP1 ameliorates APP and BACE-induced locomotor dysfunction in a *Drosophila* AD model.** A. Compared with control *elav-GAL4* driver flies, overexpression of APP and BACE showed significant motor impairment; B. AD models expressing GULP1 delayed the impairment of locomotor function. The average climbing indices of *elav driver control*, *elav > APP, BACE*, *elav > APP, BACE, GULP1 (3M)* and *elav > APP, BACE, GULP1 (5M)* were 91%, 74%, 90% and 89% respectively.  $N = 80$ ,  $*p < 0.05$ ; error bars represent SD from at least 80 flies from three independent experiments. The flies were raised at 19 °C and assayed at 20 dpe.

and generation of A $\beta$  in *Drosophila* [14, 19], and A $\beta$  has been reported to shorten *Drosophila* lifespan and cause photoreceptor abnormality in the compound eye [20, 21]. Thus, it is possible that the mitigation of neurotoxicity by GULP1 is due to an overall reduction of A $\beta$  production. To test this hypothesis, we overexpressed GULP1, APP and BACE using *gmr-GAL4* and examined GULP1's effect on A $\beta$  production. Indeed, we observed a significant reduction of A $\beta$ 1-40 and A $\beta$ 1-42 in *gmr > GULP1, APP, BACE* flies as compared to *gmr > APP, BACE* flies (Figure 5A), indicating that GULP1 rescues structural, behavioral and longevity phenotypes in the *Drosophila* AD model by lowering A $\beta$  production levels.

Active ARF6 has been shown to lower A $\beta$  generation by altering endosomal sorting of BACE1 in various mammalian cell types including primary neurons [22]. Moreover, GULP1 has been shown to alter the generation of APP C-terminal fragment  $\beta$ , a product of BACE1 cleavage of APP, in mammalian cells [7]. It is possible that GULP1 regulates APP processing *via* ARF6 in some fashion as the PTB domain of GULP1 interacts with ARF6, and the knockdown of GULP1 reduces ARF6 activation in mouse embryo fibroblast MEF 1 [23]. To test the hypothesis, we transfected cells with GULP1, and examined the levels of active ARF6 (ARF6-GTP). While the total ARF6 level did not change, more active ARF6 was observed in cells overexpressing GULP1 (Figure 5B). This suggests that GULP1 possibly reduces A $\beta$  production and neurotoxicity *via* the activation of ARF6.

## DISCUSSION

Several lines of evidence from cell models suggest GULP1 modulates APP processing [7, 8]. However, the biological roles of GULP1 on A $\beta$  productions *in vivo* and the subsequent physiological effects remain unknown. The current study provides first evidence that GULP1 affects human APP metabolism *in vivo* and improve structural, behavioral and longevity phenotypes in a *Drosophila* AD model.

The mechanism(s) by which GULP1 alters APP processing is largely unknown. GULP1 has been shown to interact with ARF6 [23], a member of the Ras superfamily of small GTPases functions in trafficking the membrane components between the plasma membrane and endosomal compartments (see review [24]). Several studies have shown that endosomes contain high level of BACE, and are a major subcellular compartment for A $\beta$  production (see review [25]). In fact, active ARF6 has been shown to regulate endosomal sorting of BACE1 and lead to reduction in A $\beta$  generation [22]. Here, we showed that overexpression of GULP1 could induce ARF6 activation. Hence, the effect of GULP1 on APP processing in *Drosophila* may be *via* activation of dARF6, the fly homolog of ARF6. Alternatively, dCED-6, the fly homologue of GULP1, has been reported to function as an *in vivo* clathrin adaptor for clathrin-mediated Yolkless uptake in *Drosophila* oocytes [26-28]. As APP internalization is also clathrin-mediated [29], it is possible

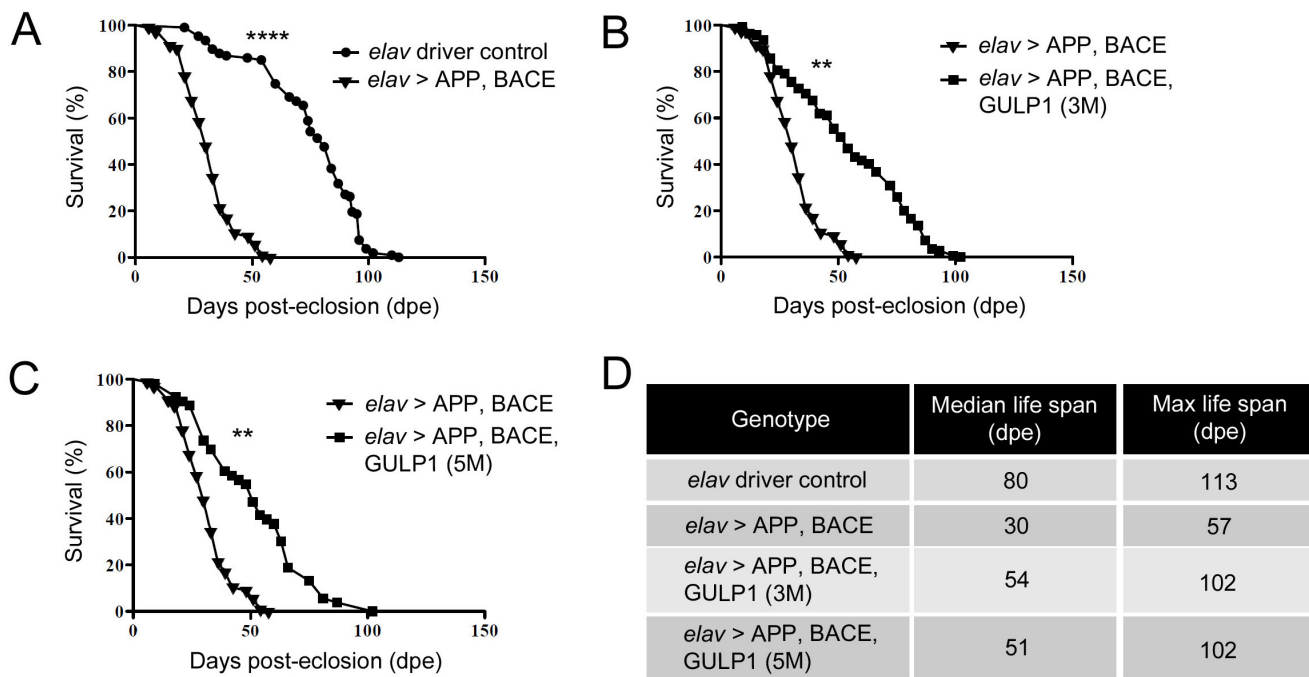

**Figure 3: GULP1 extends life span in a *Drosophila* AD model.** A. Compared with control flies, overexpression of APP and BACE showed significantly shorter life span; B.-C. AD models expressing GULP1 demonstrated significantly longer survival time. D. Quantification of life span.  $N = 70$ . Log-rank (Mantel-Cox) test was performed. \*\*\*\*  $p < 0.0001$ , \*\*  $p = 0.0013$ , \*\*  $p = 0.0039$  for A., B. and C. respectively. At least 70 flies from three independent experiments were assayed. The flies were raised at 19 °C.

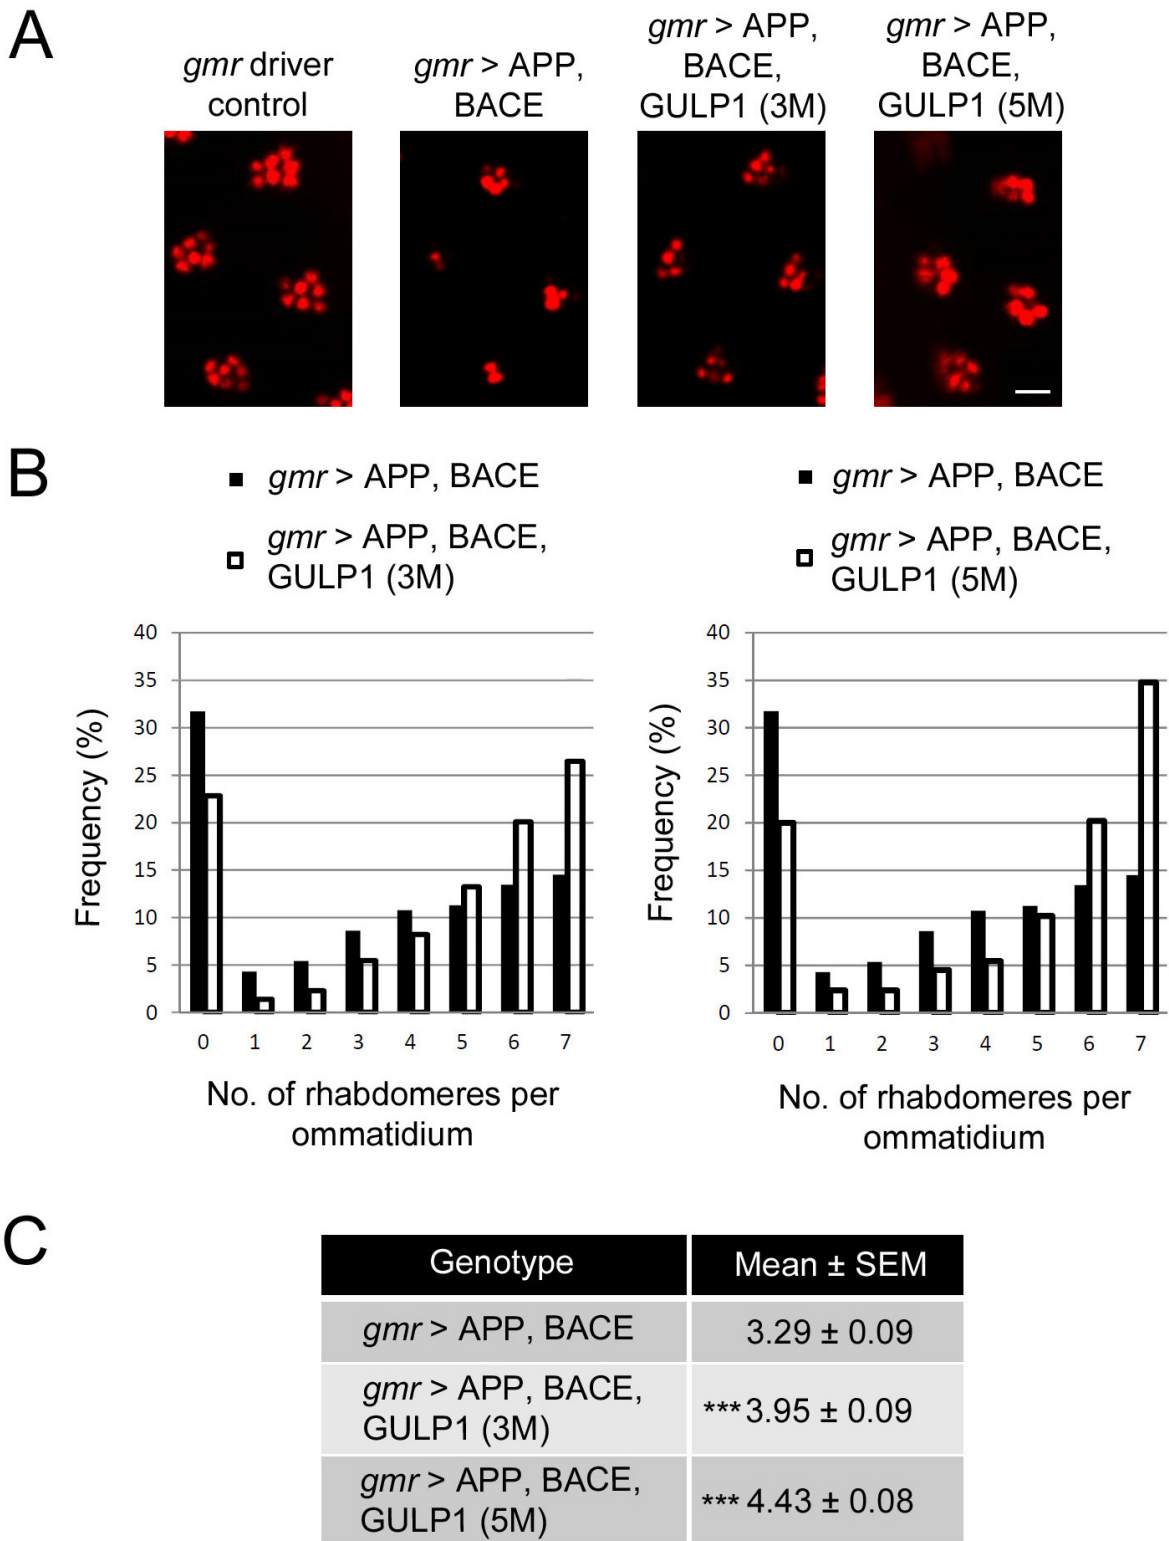

**Figure 4: GULP1 reduces retinal degeneration in a *Drosophila* AD model.** **A.** Representative photomicrographs of fly retina in AD models with or without GULP1 expression from one of the three independent experiments. Scale bar is 7  $\mu$ m. **B.** Distribution pattern of number of visible rhabdomeres per ommatidium in AD models with or without GULP1 expression from one experiment. Similar trend was observed in the other two independent experiments. **C.** Quantification of visible rhabdomeres. On average, 3.29 rhabdomeres per ommatidium were observed in flies expressing APP695 and BACE. Overexpression of GULP1 significantly suppressed the degeneration induced by APP and BACE expression, and increased the rhabdomere score to an average of 3.95 and 4.43 respectively.  $N = 300$ , \*\*\* $p < 0.01$ . Flies were from three independent experiments. The flies were raised at 19 °C and assayed at 5 dpe.

that GULP1 regulates APP endocytosis processing in flies. It is also suggested that GULP1 may reduce maturation of APP along the secretory pathway and impair APP trafficking to the plasma membrane. Such retention of APP proteins in the secretory pathway consequently traps more of them inside the cells, limiting their processing by secretases at the plasma membrane, and ultimately reduced A $\beta$  generation [8]. This is consistent with our observation that the level of APP appeared to be increased when GULP1 was overexpressed (Figure 1B).

In *Drosophila*, dCED-6 is a key molecule in the Draper pathway mediating the glial engulfment of dying/injured neurons as well as presynaptic debris at the larval neuromuscular junction [26, 30, 31]. Since *elav-GAL4*'s expression includes both neuronal and glial cells [32], it is possible that the overexpression of GULP1 in glia activated the Draper pathway, and facilitate the engulfment of extracellular A $\beta$ . In fact, many previous studies have demonstrated the role of glial cells in A $\beta$  clearance and degradation [33-38]. Additionally, the suppressive effect of GULP1 on A $\beta$  level and reduced structural and behavioral abnormalities could be a result of potential neuroprotective effect of GULP1 on A $\beta$  clearance as GULP1 is reported to stimulate the signaling of transforming growth factor- $\beta$  (TGF- $\beta$ ) [39], a neurotrophic cytokine against A $\beta$  toxicity [40].

On the other hand, conflicting effect of GULP1 on APP processing are reported [7, 8]. Similar controversies are reported for other AICD interacting proteins including

FE65s and X11s [9, 41-49]. Noteworthy, GULP1, FE65s and X11s are adaptor proteins that functions in recruiting interactors for various biological pathways. One possible reason for such conflicting observations is that the cell types or models employed in the studies expressing different types and amounts of their interactors. Thus, in addition to ARF6, other GULP1 interactors may also participate in regulating APP processing. Moreover, a number of studies have revealed that the phosphorylation status of APP interactors would influence their effects on APP processing [50, 51]. Noteworthy, phosphoproteomic and mass spectrometric analyses from various laboratories have shown that GULP1 is a phosphoprotein [52-55]. Hence, the discrepancy in the effect of GULP1 on APP processing may also be a result of phosphorylation status of GULP1. Therefore, identification of the full spectrum of GULP1 interacting proteins and investigation of the role of GULP1 phosphorylation will provide further mechanistic insights into how GULP1 modulates APP processing.

Although lowering A $\beta$  by the enhancement of A $\beta$  clearance using recombinant A $\beta$  antibodies have shown promises in mouse model [56], Eli Lilly recently announced that their A $\beta$  antibody drug Solanezumab failed to demonstrate efficacy in an 18-month phase III clinical trial with over 2,100 participants. The exact reasons for the failure of the trial remain to be determined [57]. Solanezumab is thought to be function by sequestering A $\beta$  to promote A $\beta$  clearance. However, the drug could not lower A $\beta$  generation. Therefore,

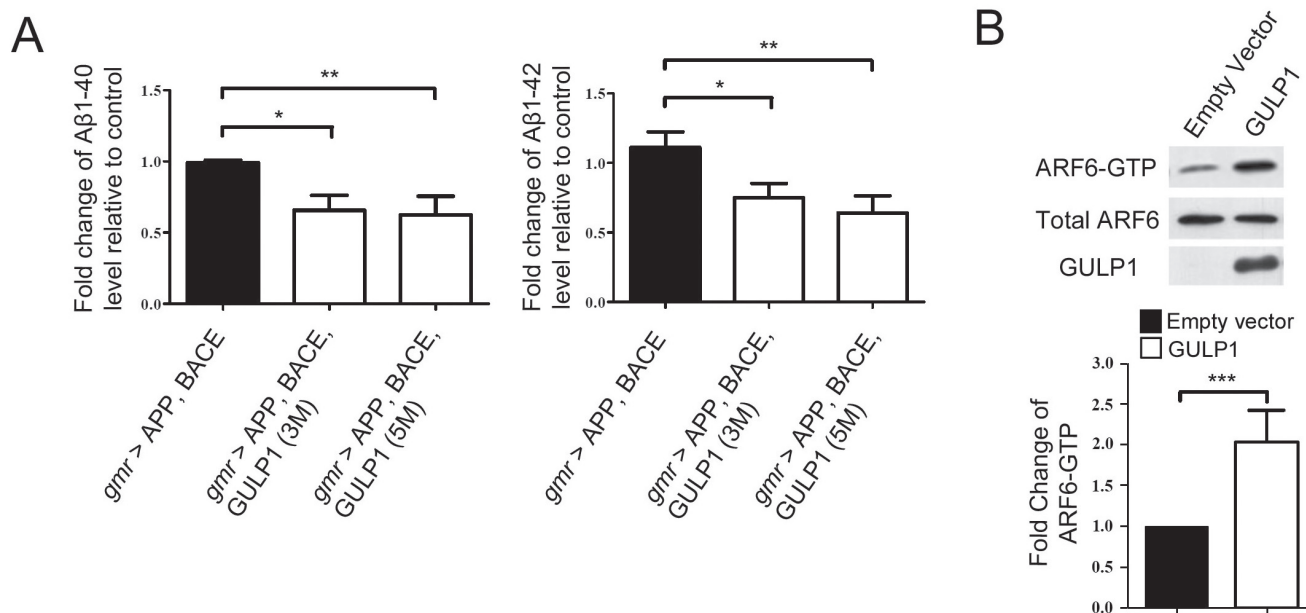

**Figure 5: Overexpression of GULP1 decreases A $\beta$ 1-40 and A $\beta$ 1-42 levels in a *Drosophila* AD model.** A. A $\beta$ 1-40 and A $\beta$ 1-42 levels were measured by human A $\beta$  ELISA. Both A $\beta$ 1-40 and A $\beta$ 1-42 decreased significantly in flies expressing GULP1.  $**p < 0.01$ ,  $*p < 0.05$ ; Error bars are SD from at least 120 flies from three independent experiments. The flies were raised at 28 °C and assayed at 6dpe. B. Total ARF6 levels and ARF6-GTP levels were examined in CHO cells overexpressing GULP1 by immunoblotting (Top panel). Bar chart shows relative ARF6-GTP amount. Data were obtained from three independent experiments.  $N = 3$ ,  $*p < 0.001$ . Error bars are SD.

combination therapy that increases A $\beta$  clearance and suppresses A $\beta$  production may be an alternative approach for AD. However, current strategies for reducing A $\beta$  production remain unsatisfactory such as the use of  $\gamma$ -secretase inhibitors. Our finding that GULP1 reduces A $\beta$  production in an AD *Drosophila* model does not only improve our understanding of the function of GULP1 in APP processing *in vivo*, but also opens a novel avenue for investigating the possibility of targeting GULP1-APP interaction to alter A $\beta$  production.

## MATERIALS AND METHODS

### Generation of *UAS-GULP1* lines in *Drosophila*

The full length human GULP1 cDNA was amplified by PCR and subcloned into GAL4-responsive pUAST expression vector, and microinjected into *Drosophila* embryos (BestGene Inc, USA). The expressions of GULP1 in 5 independent lines (1M, 2M, 3M 4M and 5M) were determined by Western blotting.

### *Drosophila* stocks

Fly stocks and crosses were raised on standard cornmeal medium with 1.25% agar; 10.5% dextrose; 10.5% cornmeal and 2.1% yeast. Flies were kept in incubators (LMS Ltd., UK) maintained at 18 °C, 19°C, 25°C or 28°C as specified. *elav-GAL4* (458), *gmr-GAL4* (1104), *UAS-APP695*, *UAS-BACE* (33797) were obtained from Bloomington *Drosophila* Stock Center, USA. Virgin females for crosses were collected within 8 hours at 25°C or 16 hours at 18°C.

### Western blot analysis

Fifteen fly heads were collected and homogenized in 75  $\mu$ l 2X SDS sample buffer containing 100mM Tris, 4% SDS, 0.2% Bromophenol blue, 20% Glycerol and 15  $\mu$ l/ml  $\beta$ -mercaptoethanol. Lysates were then boiled for 10 minutes and separated by SDS/PAGE gels. Protein on the gels was transferred to nitrocellulose blotting membrane (PALL) using a wet blotting system (Bio-Rad). Blots were probed with the following antibodies: Anti-GULP1 [7]; Anti-APP [48]; Anti-BACE [49]; Anti-actin A2103 (Sigma).

### A $\beta$ ELISA

Human A $\beta$ 1-40 and A $\beta$ 1-42 in the fly heads were determined by using the human  $\beta$ 40 and  $\beta$ 42 ELISA kits (Millipore). In brief, 15 fly heads were homogenized in 50  $\mu$ l ice-cold 1X RIPA buffer containing 50 mM Tris,

150 mM NaCl, 1% SDS, 1% NP-40, 0.5% sodium deoxycholate, pH 8.0 and Complete™ protease inhibitor (Roche). The homogenates were diluted 10-fold with 450  $\mu$ l sample diluent and then cleared by centrifugation at 15,000 rpm for 5 minutes at 4°C. 200  $\mu$ l of supernatant of each sample was added to ELISA plate with primary antibody. After overnight incubation at 4°C, the ELISA plate was washed with wash buffer. Streptavidin-peroxidase-conjugate was then added for colorimetric signal development at room temperature. The colorimetric reaction was stopped by adding stop solution, and signals were measured at 450 nm by using a microplate reader (Bio-Rad).

### Pseudopupil assay

Pseudopupil assay was performed essentially as described previously [58, 59]. In brief, 5 days post-eclosion (dpe) fly eyes were examined under a light microscope (Olympus CX31) with a 60X oil objective. At least 200 ommatidia from at least 15 adult flies obtained from three independent crosses were used to calculate the average number of rhabdomeres per ommatidium.

### Locomotor activity assay

Locomotor activity of the flies were determined at 20 dpe. In brief, group of 10 flies were placed at the bottom of a 15mL falcon tube. The number of flies that successfully climbed up a vertical distance of 8 cm or more was recorded. At least 80 flies of each genotype were analyzed in an experiment. Three independent experiment were performed.

### Longevity assay

Groups of 15 flies were placed in a food vial. Dead flies were counted every 3 days. At least 70 flies were assayed for each genotype from three independent crosses.

### ARF6 activation assay

ARF6 activation assay was performed as described previously [60] by an active ARF6 pull-down kit (Cell Biolabs). ARF6 was detected by a mouse anti-ARF6 supplied from the kit.

### Statistical analysis

The Mann-Whitney rank sum test was performed to compare mean differences between the average numbers of rhabdomeres per ommatidium in pseudopupil assay. One-way ANOVA test with Tukey post-hoc analysis was

performed for ELISA analysis and climbing assay. Log-rank (Mantel-Cox) Test was performed for survival assay. A P-value of less than 0.05 was considered statistically significant. Significance is indicated as  $*p < 0.05$ ,  $**p < 0.01$ .

### Author contributions

WYVC and ACK designed and performed the experiments. ACK, JCKN, HYEC and KFL conceived the study, designed the experiments and wrote the manuscript.

### CONFLICTS OF INTEREST

There is no conflict of interest.

### GRANT SUPPORT

This work was supported by funds from the Health and Medical Research Fund (Grant number: 03140086), Research Grants Council Hong Kong (Grant number: 469610) and CUHK direct grant scheme (Grant numbers: 4053045 and 4053102).

### REFERENCES

1. Liu QA, Hengartner MO. Human CED-6 encodes a functional homologue of the *Caenorhabditis elegans* engulfment protein CED-6. *Curr Biol*. 1999; 9: 1347-50.
2. Smits E, Van Criekinge W, Plaetinck G, Bogaert T. The human homologue of *Caenorhabditis elegans* CED-6 specifically promotes phagocytosis of apoptotic cells. *Curr Biol*. 1999; 9: 1351-4.
3. Su HP, Nakada-Tsukui K, Tosello-Trampont AC, Li Y, Bu G, Henson PM, Ravichandran KS. Interaction of CED-6/GULP, an adapter protein involved in engulfment of apoptotic cells with CED-1 and CD91/low density lipoprotein receptor-related protein (LRP). *J Biol Chem*. 2002; 277: 11772-9.
4. Park SY, Kang KB, Thapa N, Kim SY, Lee SJ, Kim IS. Requirement of adaptor protein GULP during stabilin-2-mediated cell corpse engulfment. *J Biol Chem*. 2008; 283: 10593-600. doi: 10.1074/jbc.M709105200.
5. Kim S, Park SY, Kim SY, Bae DJ, Pyo JH, Hong M, Kim IS. Cross-talk between engulfment receptors, stabilin-2 and integrin  $\alpha$ v $\beta$ 5 orchestrates engulfment of phosphatidylserine exposed erythrocytes. *Mol Cell Biol*. 2012; 32: 2698-708. doi: 10.1128/MCB.06743-11.10.1128.
6. Park SY, Kim SY, Kang KB, Kim IS. Adaptor protein GULP is involved in stabilin-1-mediated phagocytosis. *Biochem Biophys Res Commun*. 2010; 398: 467-72. doi: 10.1016/j.bbrc.2010.06.101.
7. Hao CY, Perkinton MS, Chan WW, Chan HY, Miller CC, Lau KF. GULP1 is a novel APP-interacting protein that alters APP processing. *Biochem J*. 2011; 436: 631-9. doi: 10.1042/BJ20110145.
8. Beyer AS, von Einem B, Schwanzar D, Keller IE, Hellrung A, Thal DR, Ingelsson M, Makarova A, Deng M, Chhabra ES, Propper C, Bockers TM, Hyman BT, et al. Engulfment adapter PTB domain containing 1 interacts with and affects processing of the amyloid-beta precursor protein. *Neurobiol Aging*. 2012; 33: 732-43. doi: 10.1016/j.neurobiolaging.2010.06.006.
9. Taru H, Suzuki T. Regulation of the Physiological Function and Metabolism of A $\beta$ PP by A $\beta$ PP Binding Proteins. *J Alzheimers Dis*. 2009; 18: 253-65. doi: 10.3233/JAD-2009-1148.
10. Buoso E, Lanni C, Schettini G, Govoni S, Racchi M. beta-Amyloid precursor protein metabolism: focus on the functions and degradation of its intracellular domain. *Pharmacol Res*. 2010; 62: 308-17. doi: 10.1016/j.phrs.2010.05.002.
11. Shulman JM, Shulman LM, Weiner WJ, Feany MB. From fruit fly to bedside: translating lessons from *Drosophila* models of neurodegenerative disease. *Curr Opin Neurol*. 2003; 16: 443-9.
12. Moloney A, Sattelle DB, Lomas DA, Crowther DC. Alzheimer's disease: insights from *Drosophila melanogaster* models. *Trends Biochem Sci*. 2010; 35: 228-35. doi: 10.1016/j.tibs.2009.11.004.
13. Iijima K, Liu HP, Chiang AS, Hearn SA, Konsolaki M, Zhong Y. Dissecting the pathological effects of human Abeta40 and Abeta42 in *Drosophila*: a potential model for Alzheimer's disease. *Proc Natl Acad Sci U S A*. 2004; 101: 6623-8. doi: 10.1073/pnas.0400895101.
14. Chakraborty R, Vepuri V, Mhatre SD, Paddock BE, Miller S, Michelson SJ, Delvadia R, Desai A, Vinokur M, Melicharek DJ, Utreja S, Khandelwal P, Ansaloni S, et al. Characterization of a *Drosophila* Alzheimer's disease model: pharmacological rescue of cognitive defects. *PLoS One*. 2011; 6: e20799. doi: 10.1371/journal.pone.0020799.
15. Le Corre S, Klafki HW, Plesnila N, Hubinger G, Obermeier A, Sahagun H, Monse B, Seneci P, Lewis J, Eriksen J, Zehr C, Yue M, McGowan E, et al. An inhibitor of tau hyperphosphorylation prevents severe motor impairments in tau transgenic mice. *Proc Natl Acad Sci U S A*. 2006; 103: 9673-8. doi: 10.1073/pnas.0602913103.
16. Crowther DC, Kinghorn KJ, Miranda E, Page R, Curry JA, Duthie FA, Gubb DC, Lomas DA. Intraneuronal Abeta, non-amyloid aggregates and neurodegeneration in a *Drosophila* model of Alzheimer's disease. *Neuroscience*. 2005; 132: 123-35. doi: 10.1016/j.neuroscience.2004.12.025.
17. Chan HY, Bonini NM. *Drosophila* models of human neurodegenerative disease. *Cell Death Differ*. 2000; 7: 1075-80.
18. Sang TK, Jackson GR. *Drosophila* models of neurodegenerative disease. *NeuroRx*. 2005; 2: 438-46. doi: 10.1602/neurorx.2.3.438.



19. Greeve I, Kretschmar D, Tschape JA, Beyn A, Brellinger C, Schweizer M, Nitsch RM, Reifegerste R. Age-dependent neurodegeneration and Alzheimer-amyloid plaque formation in transgenic *Drosophila*. *J Neurosci*. 2004; 24: 3899-906. doi: 10.1523/JNEUROSCI.0283-04.2004.
20. Finelli A, Kelkar A, Song HJ, Yang H, Konsolaki M. A model for studying Alzheimer's Abeta42-induced toxicity in *Drosophila melanogaster*. *Mol Cell Neurosci*. 2004; 26: 365-75. doi: 10.1016/j.mcn.2004.03.001.
21. Iijima K, Ando K, Takeda S, Satoh Y, Seki T, Itoharu S, Greengard P, Kirino Y, Nairn AC, Suzuki T. Neuron-specific phosphorylation of Alzheimer's beta-amyloid precursor protein by cyclin-dependent kinase 5. *J Neurochem*. 2000; 75: 1085-91.
22. Sannerud R, Declerck I, Peric A, Raemaekers T, Menendez G, Zhou L, Veerle B, Coen K, Munck S, De Strooper B, Schiavo G, Annaert W. ADP ribosylation factor 6 (ARF6) controls amyloid precursor protein (APP) processing by mediating the endosomal sorting of BACE1. *Proc Natl Acad Sci U S A*. 2011; 108: E559-68. doi: 10.1073/pnas.1100745108.
23. Ma Z, Nie Z, Luo R, Casanova JE, Ravichandran KS. Regulation of Arf6 and ACAP1 signaling by the PTB-domain-containing adaptor protein GULP. *Curr Biol*. 2007; 17: 722-7.
24. Sabe H, Hashimoto S, Morishige M, Ogawa E, Hashimoto A, Nam JM, Miura K, Yano H, Onodera Y. The EGFR-GEP100-Arf6-AMAP1 signaling pathway specific to breast cancer invasion and metastasis. *Traffic*. 2009; 10: 982-93. doi: 10.1111/j.1600-0854.2009.00917.x.
25. Thinakaran G, Koo EH. Amyloid precursor protein trafficking, processing, and function. *J Biol Chem*. 2008; 284: 29615-9. doi: 10.1074/jbc.R800019200.
26. Awasaki T, Tatsumi R, Takahashi K, Arai K, Nakanishi Y, Ueda R, Ito K. Essential role of the apoptotic cell engulfment genes draper and ced-6 in programmed axon pruning during *Drosophila* metamorphosis. *Neuron*. 2006; 50: 855-67. doi: 10.1016/j.neuron.2006.04.027.
27. Jha A, Watkins SC, Traub LM. The apoptotic engulfment protein Ced-6 participates in clathrin-mediated yolk uptake in *Drosophila* egg chambers. *Mol Biol Cell*. 2012; 23: 1742-64. doi: 10.1091/mbc.E11-11-0939.
28. Cuttell L, Vaughan A, Silva E, Escaron CJ, Lavine M, Van Goethem E, Eid JP, Quirin M, Franc NC. Undertaker, a *Drosophila* Junctophilin, links Draper-mediated phagocytosis and calcium homeostasis. *Cell*. 2008; 135: 524-34. doi: 10.1016/j.cell.2008.08.033.
29. Cirrito JR, Kang JE, Lee J, Stewart FR, Verges DK, Silverio LM, Bu G, Mennerick S, Holtzman DM. Endocytosis is required for synaptic activity-dependent release of amyloid-beta in vivo. *Neuron*. 2008; 58: 42-51. doi: 10.1016/j.neuron.2008.02.003.
30. Fuentes-Medel Y, Logan MA, Ashley J, Ataman B, Budnik V, Freeman MR. Glia and muscle sculpt neuromuscular arbors by engulfing destabilized synaptic boutons and shed presynaptic debris. *PLoS Biol*. 2009; 7: e1000184. doi: 10.1371/journal.pbio.1000184.
31. MacDonald JM, Beach MG, Porpiglia E, Sheehan AE, Watts RJ, Freeman MR. The *Drosophila* cell corpse engulfment receptor Draper mediates glial clearance of severed axons. *Neuron*. 2006; 50: 869-81. doi: 10.1016/j.neuron.2006.04.028.
32. Berger C, Renner S, Luer K, Technau GM. The commonly used marker ELAV is transiently expressed in neuroblasts and glial cells in the *Drosophila* embryonic CNS. *Dev Dyn*. 2007; 236: 3562-8. doi: 10.1002/dvdy.21372.
33. Wyss-Coray T, Loike JD, Brionne TC, Lu E, Anankov R, Yan F, Silverstein SC, Husemann J. Adult mouse astrocytes degrade amyloid-beta in vitro and in situ. *Nat Med*. 2003; 9: 453-7. doi: 10.1038/nm838.
34. Liu CC, Hu J, Zhao N, Wang J, Wang N, Cirrito JR, Kanekiyo T, Holtzman DM, Bu G. Astrocytic LRP1 Mediates Brain Abeta Clearance and Impacts Amyloid Deposition. *J Neurosci*. 2017; 37: 4023-31. doi: 10.1523/JNEUROSCI.3442-16.2017.
35. Eugenin J, Vecchiola A, Murgas P, Arroyo P, Cornejo F, von Bernhardi R. Expression Pattern of Scavenger Receptors and Amyloid-beta Phagocytosis of Astrocytes and Microglia in Culture are Modified by Acidosis: Implications for Alzheimer's Disease. *J Alzheimers Dis*. 2016; 53: 857-73. doi: 10.3233/JAD-160083.
36. Marsh SE, Abud EM, Lakatos A, Karimzadeh A, Yeung ST, Davtyan H, Fote GM, Lau L, Weinger JG, Lane TE, Inlay MA, Poon WW, Blurton-Jones M. The adaptive immune system restrains Alzheimer's disease pathogenesis by modulating microglial function. *Proc Natl Acad Sci U S A*. 2016; 113: E1316-25. doi: 10.1073/pnas.1525466113.
37. Yamamoto N, Fujii Y, Kasahara R, Tanida M, Ohora K, Ono Y, Suzuki K, Sobue K. Simvastatin and atorvastatin facilitates amyloid beta-protein degradation in extracellular spaces by increasing neprilysin secretion from astrocytes through activation of MAPK/Erk1/2 pathways. *Glia*. 2016; 64: 952-62. doi: 10.1002/glia.22974.
38. Xiao Q, Yan P, Ma X, Liu H, Perez R, Zhu A, Gonzales E, Burchett JM, Schuler DR, Cirrito JR, Diwan A, Lee JM. Enhancing astrocytic lysosome biogenesis facilitates Abeta clearance and attenuates amyloid plaque pathogenesis. *J Neurosci*. 2014; 34: 9607-20. doi: 10.1523/JNEUROSCI.3788-13.2014.
39. Ma CI, Martin C, Ma Z, Hafiane A, Dai M, Lebrun JJ, Kiss RS. Engulfment protein GULP is regulator of transforming growth factor-beta response in ovarian cells. *J Biol Chem*. 2012; 287: 20636-51. doi: 10.1074/jbc.M111.314997.
40. Caraci F, Battaglia G, Bruno V, Bosco P, Carbonaro V, Giuffrida ML, Drago F, Sortino MA, Nicoletti F, Copani A. TGF-beta1 pathway as a new target for neuroprotection in Alzheimer's disease. *CNS Neurosci Ther*. 2011; 17: 237-49. doi: 10.1111/j.1755-5949.2009.00115.x.

41. Wang B, Hu Q, Hearn MG, Shimizu K, Ware CB, Liggitt DH, Jin LW, Cool BH, Storm DR, Martin GM. Isoform-specific knockout of FE65 leads to impaired learning and memory. *J Neurosci Res.* 2004; 75: 12-24.
42. Lee JH, Lau KF, Perkinton MS, Standen CL, Rogelj B, Falinska A, McLoughlin DM, Miller CC. The neuronal adaptor protein X11 $\beta$  reduces amyloid  $\beta$ -protein levels and amyloid plaque formation in the brains of transgenic mice. *J Biol Chem.* 2004; 279: 49099-104.
43. Lee JH, Lau KF, Perkinton MS, Standen CL, Shemilt SJ, Mercken L, Cooper JD, McLoughlin DM, Miller CC. The neuronal adaptor protein X11 $\alpha$  reduces A $\beta$  levels in the brains of Alzheimer's APPswe Tg2576 transgenic mice. *J Biol Chem.* 2003; 278: 47025-9.
44. Ho A, Liu X, Sudhof TC. Deletion of Mint proteins decreases amyloid production in transgenic mouse models of Alzheimer's disease. *J Neurosci.* 2008; 28: 14392-400. doi: 10.1523/JNEUROSCI.2481-08.2008
45. Saluja I, Paulson H, Gupta A, Turner RS. X11 $\alpha$  haploinsufficiency enhances Abeta amyloid deposition in Alzheimer's disease transgenic mice. *Neurobiol Dis.* 2009; 36: 162-8. doi: 10.1016/j.nbd.2009.07.006.
46. Saito Y, Sano Y, Vassar R, Gandy S, Nakaya T, Yamamoto T, Suzuki T. X11 proteins regulate the translocation of amyloid beta-protein precursor (APP) into detergent-resistant membrane and suppress the amyloidogenic cleavage of APP by beta-site-cleaving enzyme in brain. *J Biol Chem.* 2008; 283: 35763-71. doi: 10.1074/jbc.M801353200.
47. Sano Y, Syuzo-Takabatake A, Nakaya T, Saito Y, Tomita S, Itoharu S, Suzuki T. Enhanced amyloidogenic metabolism of APP in the X11L-deficient mouse brain. *J Biol Chem.* 2006; 281: 37853-60.
48. Lau KF, McLoughlin DM, Standen C, Miller CC. X11 $\alpha$  and X11 $\beta$  interact with presenilin-1 via their PDZ domains. *Mol Cell Neurosci.* 2000; 16: 557-65.
49. Angeletti B, Waldron KJ, Freeman KB, Bawagan H, Hussain I, Miller CC, Lau KF, Tennant ME, Dennison C, Robinson NJ, Dingwall C. BACE1 cytoplasmic domain interacts with the copper chaperone for superoxide dismutase-1 and binds copper. *J Biol Chem.* 2005; 280: 17930-7.
50. Dunning CJ, Black HL, Andrews KL, Davenport EC, Conboy M, Chawla S, Dowle AA, Ashford D, Thomas JR, Evans GJ. Multisite tyrosine phosphorylation of the N-terminus of Mint1/X11 $\alpha$  by Src kinase regulates the trafficking of amyloid precursor protein. *J Neurochem.* 2016; 137: 518-27. doi: 10.1111/jnc.13571.
51. Chow WN, Ngo JC, Li W, Chen YW, Tam KM, Chan HE, Miller CC, Lau KF. Phosphorylation of FE65 Serine-610 by serum- and glucocorticoid-induced kinase 1 modulates Alzheimer's disease amyloid precursor protein processing. *Biochem J.* 2015; 470: 303-17. doi: 10.1042/BJ20141485.
52. Cole SL, Vassar R. The role of amyloid precursor protein processing by BACE1, the  $\beta$ -secretase, in Alzheimer disease pathophysiology. *J Biol Chem.* 2008; 283: 29621-5. doi: 10.1074/jbc.R800015200.
53. Nekhoroshkova E, Albert S, Becker M, Rapp UR. A-RAF kinase functions in ARF6 regulated endocytic membrane traffic. *PLoS One.* 2009; 4: e4647. doi: 10.1371/journal.pone.0004647.
54. Chen RQ, Yang QK, Lu BW, Yi W, Cantin G, Chen YL, Fearn C, Yates JR 3rd, Lee JD. CDC25B mediates rapamycin-induced oncogenic responses in cancer cells. *Cancer Res.* 2009; 69: 2663-8. doi: 10.1158/0008-5472.CAN-08-3222.
55. Cantin GT, Yi W, Lu B, Park SK, Xu T, Lee JD, Yates JR 3rd. Combining protein-based IMAC, peptide-based IMAC, and MudPIT for efficient phosphoproteomic analysis. *J Proteome Res.* 2008; 7: 1346-51. doi: 10.1021/pr0705441.
56. DeMattos RB, Bales KR, Cummins DJ, Dodart JC, Paul SM, Holtzman DM. Peripheral anti-A beta antibody alters CNS and plasma A beta clearance and decreases brain A beta burden in a mouse model of Alzheimer's disease. *Proc Natl Acad Sci U S A.* 2001; 98: 8850-5. doi: 10.1073/pnas.151261398.
57. Abbott A, Dolgin E. Failed Alzheimer's trial does not kill leading theory of disease. *Nature.* 2016; 540: 15-6. doi: 10.1038/nature.2016.21045.
58. Tsoi H, Lau CK, Lau KF, Chan HY. Perturbation of U2AF65/NXF1-mediated RNA nuclear export enhances RNA toxicity in polyQ diseases. *Hum Mol Genet.* 2011; 20: 3787-97. doi: 10.1093/hmg/ddr297.
59. Chan WM, Tsoi H, Wu CC, Wong CH, Cheng TC, Li HY, Lau KF, Shaw PC, Perrimon N, Chan HY. Expanded polyglutamine domain possesses nuclear export activity which modulates subcellular localization and toxicity of polyQ disease protein via exportin-1. *Hum Mol Genet.* 2011; 20: 1738-50. doi: 10.1093/hmg/ddr049.
60. Cheung HN, Dunbar C, Morotz GM, Cheng WH, Chan HY, Miller CC, Lau KF. FE65 interacts with ADP-ribosylation factor 6 to promote neurite outgrowth. *FASEB J.* 2014; 28: 337-49. doi: 10.1096/fj.13-232694.
